# Supplementary material for: Assembly of anionic silver nanoclusters with controlled packing structures through site-specific ionic bridges
Source: Royal Society of Chemistry journal article supplement (doi:10.1039/d4nr01691b), 2024-01-01
Supplement: d4nr01691b1.pdf [file d4nr01691b1.pdf]

## ESI material for:

Assembly of anionic silver nanoclusters with controlled packing structures through site-specific ionic bridges

Wataru Ishii,<sup>a</sup> Rika Tanaka<sup>b</sup> and Takuya Nakashima

*a Department of Chemistry, Graduate School of Science, Osaka Metropolitan University, Sumiyoshi, Osaka 558-8585, Japan*

*b X-ray Crystal Analysis Laboratory, Graduate School of Science, Osaka Metropolitan University, Sumiyoshi, Osaka 558-8585, Japan*

**Materials.** Silver nitrate ( $\text{AgNO}_3$ , 99.8%) and triphenylphosphine (TPP, >95%) were purchased from Fujifilm Wako Chemical Corp. Benzene-1,3-dithiol (BDT, >95%), sodium borohydride ( $\text{NaBH}_4$ , >95%) and potassium borohydride ( $\text{KBH}_4$ , >98%) were obtained from TCI Co. Ltd. Cesium borohydride ( $\text{CsBH}_4$ , >98%) was purchased from Katchem Ltd. All chemicals were used as received.

**Synthesis of  $\text{Ag}_{29}(\text{BDT})_{12}(\text{TPP})_4$  NCs ( $\text{Ag}_{29}\text{-Na}$ ,  $\text{Ag}_{29}\text{-K}$ , and  $\text{Ag}_{29}\text{-Cs}$  NCs).**  $\text{Ag}_{29}$  NCs with varied alkali metal cations were prepared according to a method reported in the literature<sup>S1</sup> except that dichloromethane was used as a solvent in place of chloroform. Briefly, in a 50 mL glass vial, 36  $\mu\text{L}$  of BDT was added to 28 mL of chloroform. To this solution, 13 mL of  $\text{AgNO}_3$  solution in methanol (24 mM) was injected followed by the addition of TPP solution in chloroform (560 mg in 2.4 mL). The resulting mixture was allowed to stir for 15 min before the addition of an aqueous solution of reductant ( $\text{NaBH}_4$ , 28 mg;  $\text{KBH}_4$ , 39 mg;  $\text{CsBH}_4$ , 109 mg in 1.4 mL water). The mixture was stirred overnight (ca. 12h) to give orange precipitate. The precipitated NCs from the chloroform reaction solution were washed with methanol. The purified NCs were left to dry overnight under vacuum.

**Crystallization of  $\text{Ag}_{29}\text{-Na}$ ,  $\text{-Cs}$ ,  $\text{-K}$ ,  $\text{-K'}$  NCs.** 1 mL of pyridine solution with 3 mg  $\text{Ag}_{29}$  NCs in a 2 mL glass vial was put in a 50 mL glass vial. 2 mL of ether was added to around the 2 mL of glass tube and sealed. After few weeks, a few red crystals were obtained.

**Crystallization of  $\text{Ag}_{29}\text{-K''}$  NCs.**  $\text{Ag}_{29}\text{-K'}$  crystals were soaked in toluene for a week.

**Characterization.** UV-vis absorption spectra were recorded with a JASCO V-670 spectrophotometer. PL spectra were measured by a JASCO FP8500. All the PL spectra were electronically corrected for instrumental response in FP8500 in the range of  $\lambda_{\text{PL}} < 950$  nm. Single crystal X-ray diffraction (SCXRD) analyses was carried out using a Rigaku AFC/Mercury CCD diffractometer with Mo  $K\alpha$  radiation monochromated by graphite at 110 K. The crystal structures were solved by a direct method using SHELXT 2018/2 and refined by the full-matrix least-squares method on  $F^2$  with anisotropic displacement parameters for non-hydrogen atoms using SHELXL-2018/3. PL spectra of single-crystals were measured with an Olympus BX-51 polarizing microscope connected to a Hamamatsu PMA-11 photodetector ( $< 800$  nm) through an optical fiber. Excitation to the crystals was performed with a high-pressure mercury lamp through a band path filter (330-385 nm) and the emission band was collected through a long path filter ( $> 420$  nm). PL decay measurement was performed on a Horiba Delta Flex time-correlated single-photon-counting (TCSPC) instrument with a 370 nm LED excitation light source.

**Notification.** The obtained crystals need careful handling because of rapid evaporation of ether and subsequent dissolution of NCs with pyridine molecules existing in the crystals.

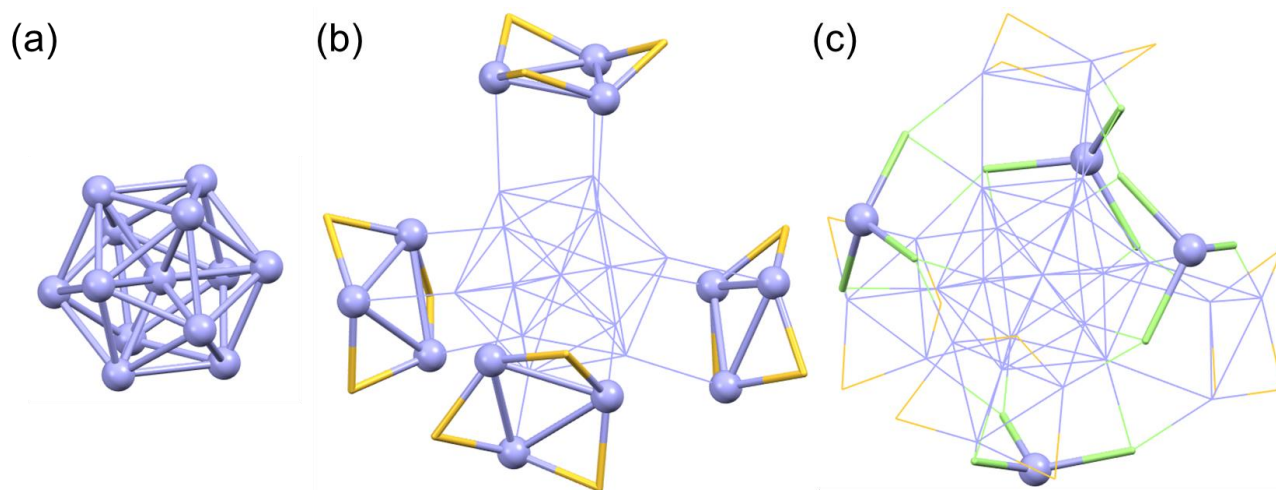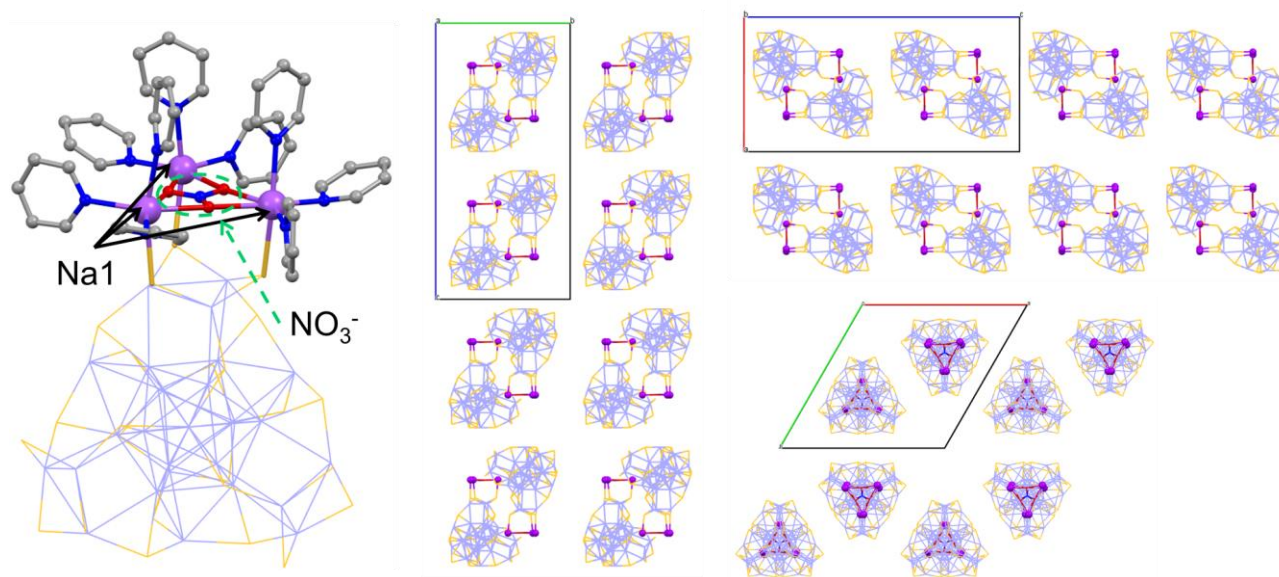

**Fig. S2** Crystal structure and crystalline packing mode of  $\text{Ag}_{29}\text{-Na}$  NCs. The solvents, unbound Na ion, C, N atoms in NC ligands and H atoms are omitted for clarity. Color code; violet, Ag; yellow, S; purple, Na; blue, N; red, O.

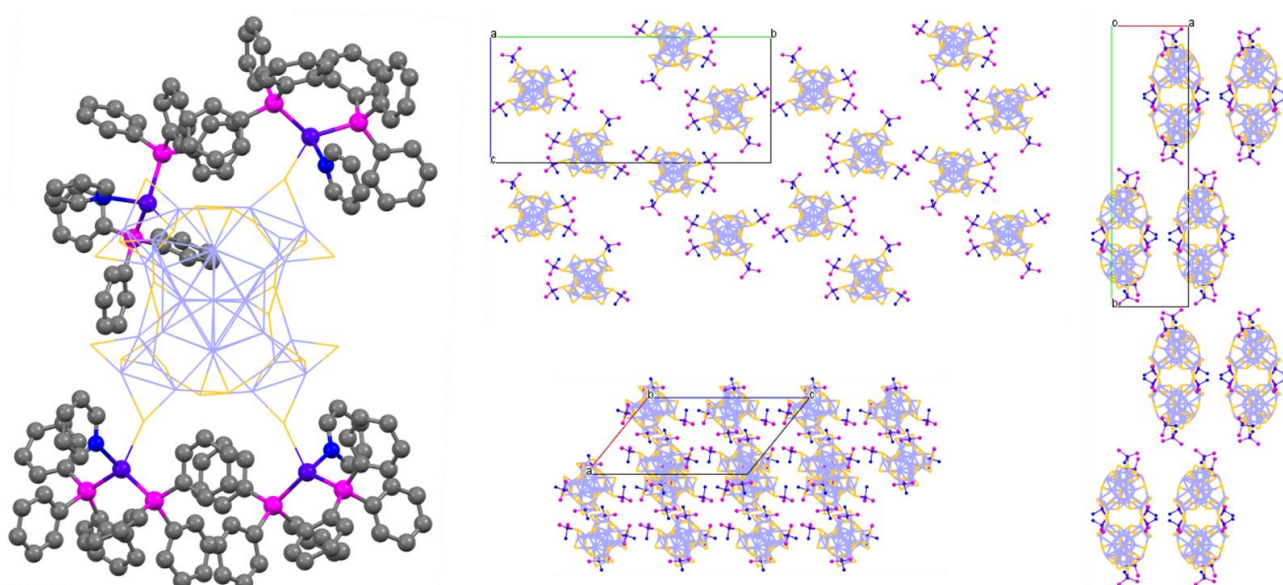

**Fig. S3** Crystal structure and crystalline packing mode of  $\text{Ag}_{29}+\text{Ag}$  NCs. The solvents, C, N, P atoms in NC ligands and H atoms are omitted for clarity. Color code; violet, purple, Ag; yellow, S; blue, N; pink, P.

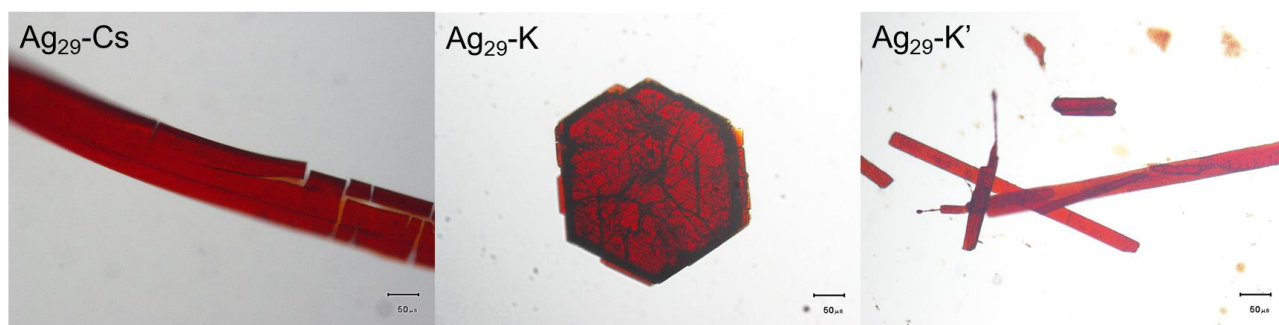

**Fig. S4** Optical microscopic images of  $\text{Ag}_{29}\text{-Cs}$ ,  $\text{K}$ ,  $\text{K}'$  NCs crystals.

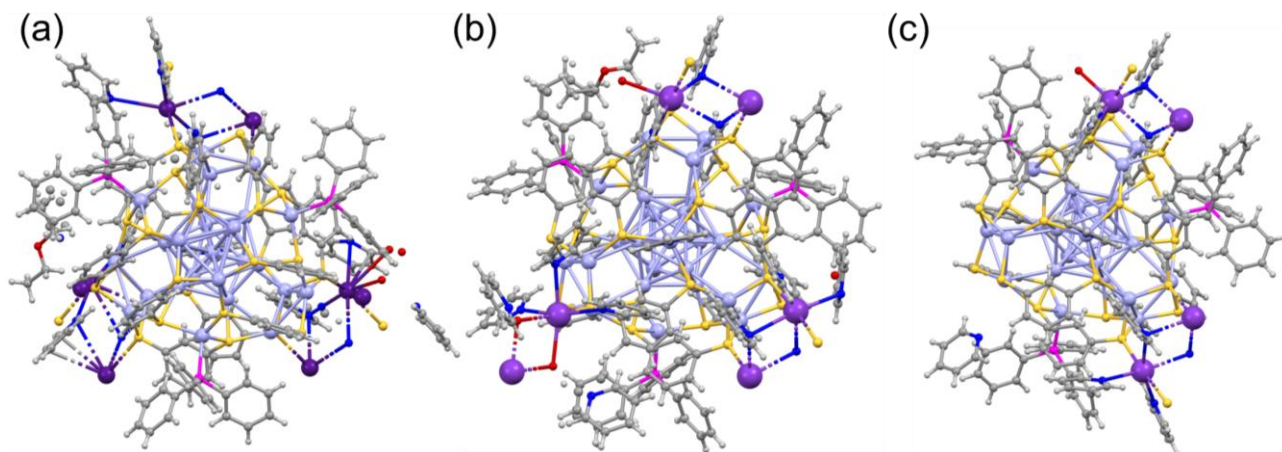

**Fig. S5** Full structure of  $\text{Ag}_{29}\text{-Cs, K, K'}$ . Color code; violet, Ag; yellow, S; purple, Cs or K; blue, N; red, O.

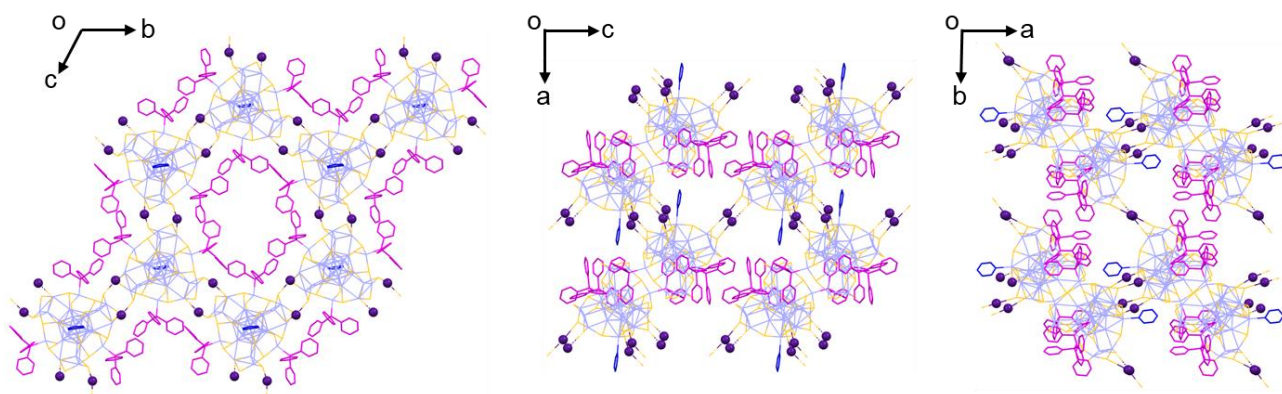

**Fig. S6** Packing structure of  $\text{Ag}_{29}\text{-Cs}$  from different axis highlighting the TPP and pyridine sub ligands. Color code; violet, Ag; purple, Cs; yellow, S; pink, TPP; blue, pyridine.

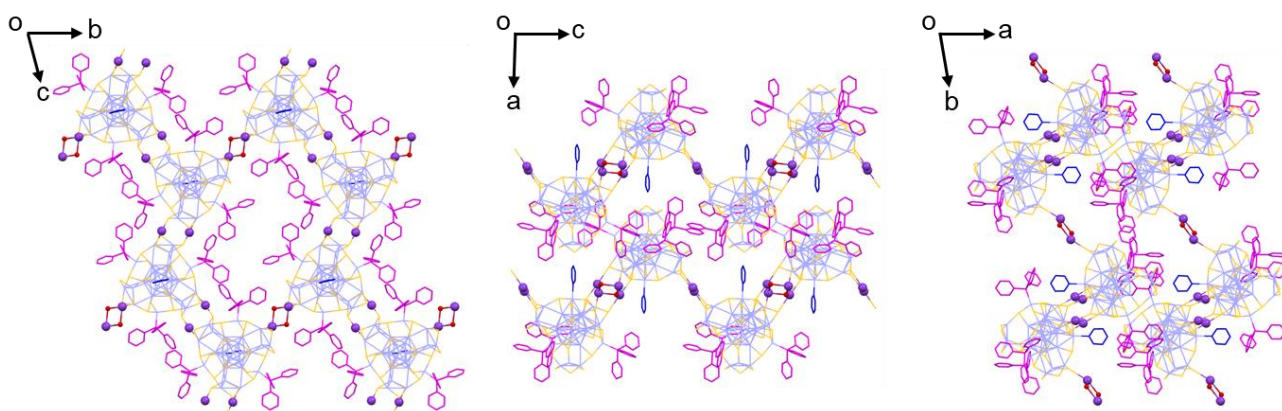

**Fig. S7** Packing structure of  $\text{Ag}_{29}\text{-K}$  from different axis highlighting the TPP and pyridine sub ligands. Color code; violet, Ag; purple, K; yellow, S; pink, TPP; blue, pyridine; red, O.

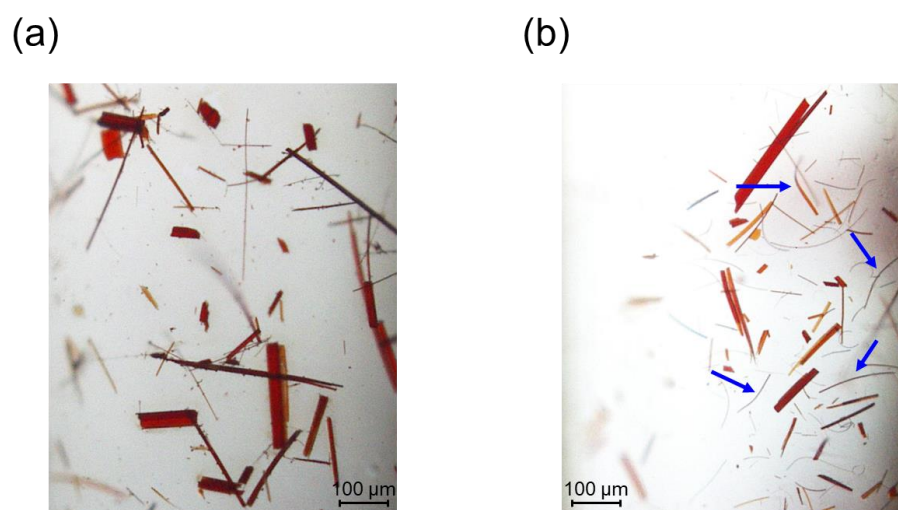

**Fig. S8** Optical microscopic images of  $\text{Ag}_{29}\text{-K}'$  NCs crystals (a) before and (b) after toluene soaking.

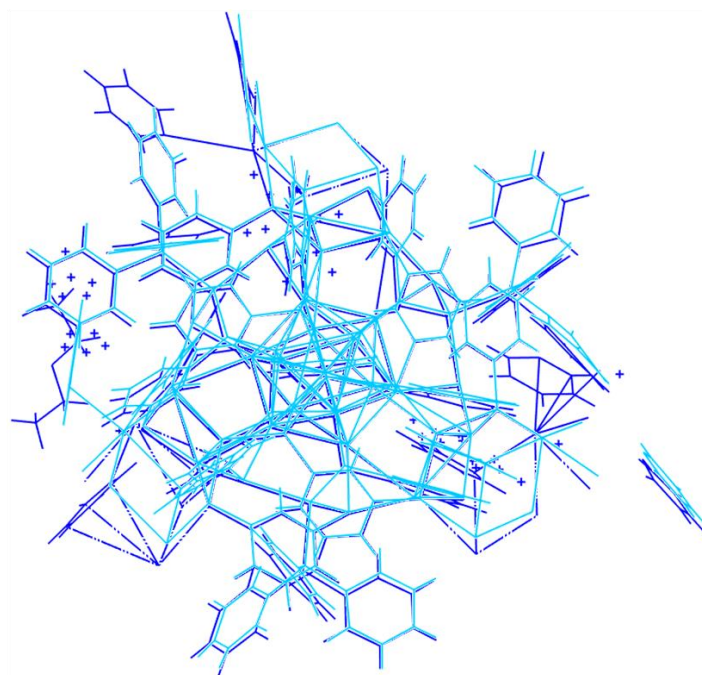

**Fig. S9** Overlapping image of the unit structure of  $\text{Ag}_{29}\text{-K}'$  (light blue) and  $\text{Ag}_{29}\text{-Cs}$  (blue).

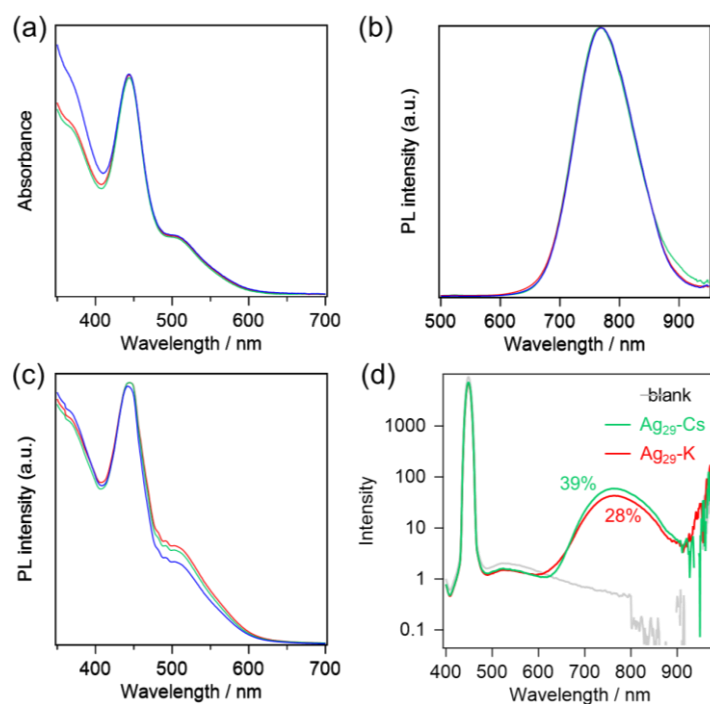

**Fig. S10** (a) Absorption, (b) PL, and (c) excitation spectra of  $\text{Ag}_{29}\text{-Cs}$  (green), K (red) and Na (blue) NCs in pyridine. (d) PL spectra of  $\text{Ag}_{29}\text{-Cs}$  and K NCs in pyridine for the estimation of PLQY with the absolute method.

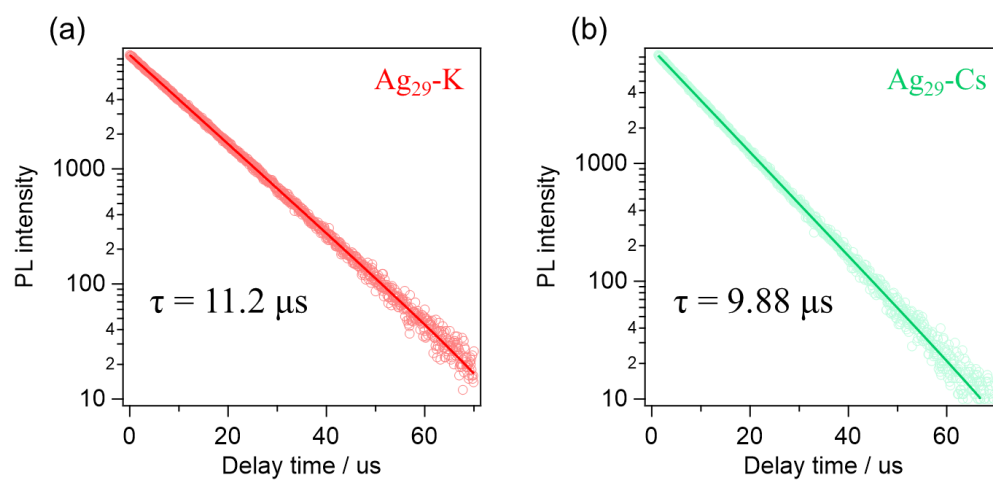

**Fig. S11** PL lifetime measurement of (a)  $\text{Ag}_{29}\text{-K}$  and (b)  $\text{Ag}_{29}\text{-Cs}$  NCs in pyridine.

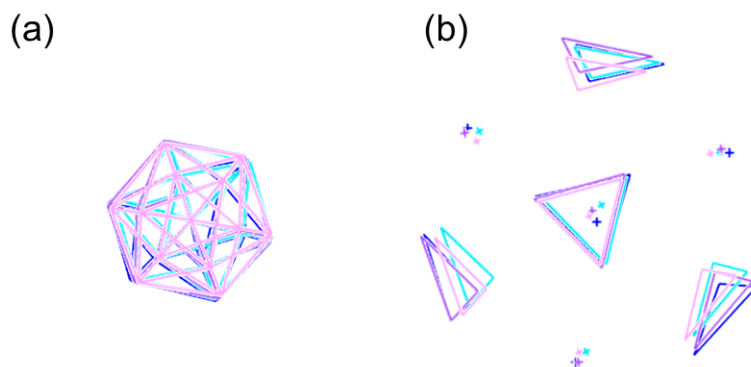

**Fig. S12** Overlapping image of the (a) core and (b) shell structure of  $\text{Ag}_{29}\text{-Cs}$  (blue),  $\text{Ag}_{29}\text{-K}$  (pink),  $\text{Ag}_{29}\text{-K'}$  (purple) and  $\text{Ag}_{29}\text{-K''}$  (light blue). Only silver atoms were shown.

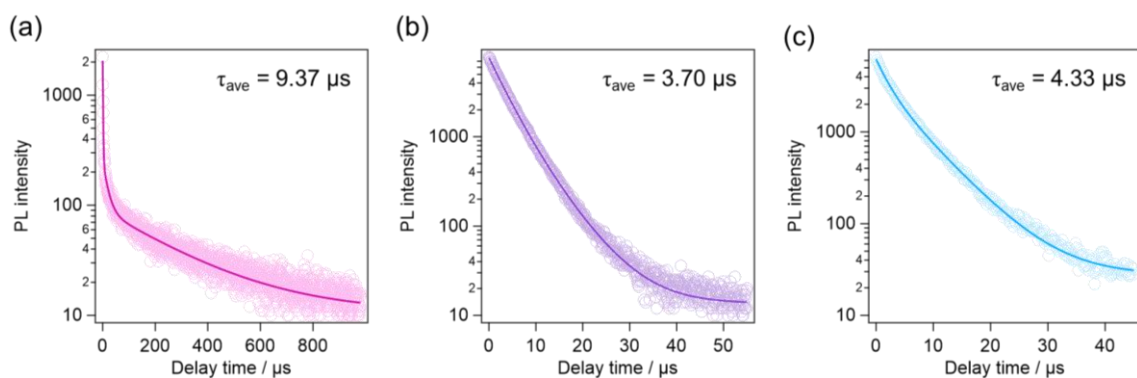

**Fig. S13** Crystal PL lifetime measurement of  $\text{Ag}_{29}\text{-K}$  (pink),  $\text{Ag}_{29}\text{-K'}$  (purple) and  $\text{Ag}_{29}\text{-K''}$  (light blue).

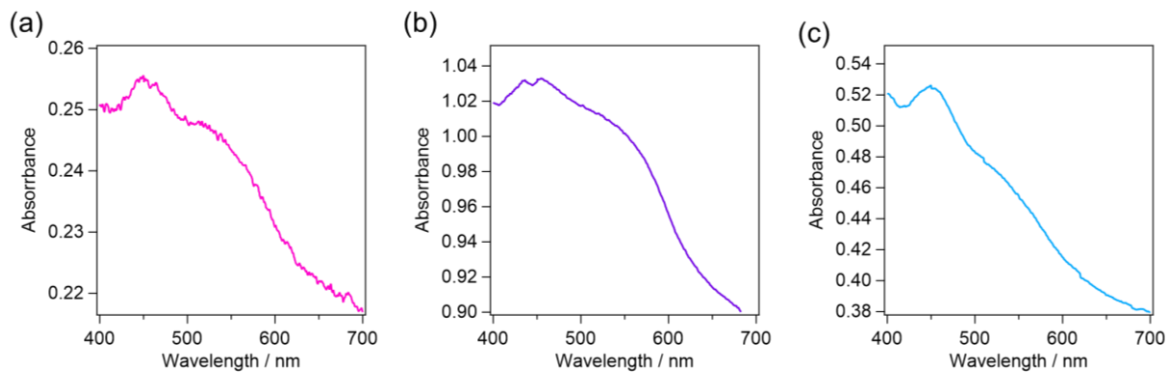

**Fig. S14** Crystal absorption spectra of  $\text{Ag}_{29}\text{-K}$  (pink),  $\text{Ag}_{29}\text{-K'}$  (purple) and  $\text{Ag}_{29}\text{-K''}$  (light blue).

**Table S1.** Crystal data and structure refinement details.

|                                                     | Ag <sub>29</sub> -Na                                                                                                                                                  | Ag <sub>29</sub> -Cs                                                                                                                                                                                                                                                                                                                                                                                                                                                                                           | Ag <sub>29</sub> -K                                                                                                                                                                                                                                                                                                                                                                                                                                              | Ag <sub>29</sub> -K'                                                                                                                                                                                                                                                | Ag <sub>29</sub> -K''                                                                                                                                                                                                                                                                                 |
|-----------------------------------------------------|-----------------------------------------------------------------------------------------------------------------------------------------------------------------------|----------------------------------------------------------------------------------------------------------------------------------------------------------------------------------------------------------------------------------------------------------------------------------------------------------------------------------------------------------------------------------------------------------------------------------------------------------------------------------------------------------------|------------------------------------------------------------------------------------------------------------------------------------------------------------------------------------------------------------------------------------------------------------------------------------------------------------------------------------------------------------------------------------------------------------------------------------------------------------------|---------------------------------------------------------------------------------------------------------------------------------------------------------------------------------------------------------------------------------------------------------------------|-------------------------------------------------------------------------------------------------------------------------------------------------------------------------------------------------------------------------------------------------------------------------------------------------------|
| Formula                                             | C <sub>132</sub> H <sub>93</sub> Ag <sub>29</sub> N <sub>13</sub> Na <sub>3</sub> O <sub>3</sub> S <sub>24</sub> , Na                                                 | C <sub>170.3</sub> H <sub>146.46</sub> Ag <sub>29</sub> Cs <sub>3</sub> N <sub>8.06</sub> O <sub>2.56</sub> P <sub>3</sub> S <sub>24</sub>                                                                                                                                                                                                                                                                                                                                                                     | C <sub>178.25</sub> H <sub>152.15</sub> Ag <sub>29</sub> K <sub>3</sub> N <sub>10.05</sub> O <sub>2.45</sub> P <sub>3</sub> S <sub>24</sub>                                                                                                                                                                                                                                                                                                                      | C <sub>161</sub> H <sub>129</sub> Ag <sub>29</sub> K <sub>2</sub> N <sub>7.5</sub> O <sub>0.5</sub> P <sub>3</sub> S <sub>24</sub>                                                                                                                                  | C <sub>166</sub> H <sub>135</sub> Ag <sub>29</sub> K <sub>3</sub> N <sub>8</sub> OP <sub>3</sub> S <sub>24</sub>                                                                                                                                                                                      |
| Formula weight                                      | 5898.82                                                                                                                                                               | 6736.39                                                                                                                                                                                                                                                                                                                                                                                                                                                                                                        | 6582.02                                                                                                                                                                                                                                                                                                                                                                                                                                                          | 6238.48                                                                                                                                                                                                                                                             | 6365.69                                                                                                                                                                                                                                                                                               |
| Molecular formula                                   | C <sub>87</sub> H <sub>63</sub> Ag <sub>29</sub> N <sub>3</sub> S <sub>24</sub> , Na <sub>3</sub> (C <sub>5</sub> H <sub>5</sub> N) <sub>3</sub> NO <sub>3</sub> , Na | C <sub>131</sub> H <sub>98</sub> Ag <sub>29</sub> NP <sub>3</sub> S <sub>24</sub> , Cs(C <sub>5</sub> H <sub>5</sub> N) <sub>2</sub> , Cs(C <sub>5</sub> H <sub>5</sub> N) <sub>2.53</sub> , Cs <sub>0.58</sub> (C <sub>5</sub> H <sub>5</sub> N) <sub>1.16</sub> (H <sub>2</sub> O) <sub>1.16</sub> , Cs <sub>0.42</sub> (C <sub>5</sub> H <sub>5</sub> N) <sub>0.42</sub> (H <sub>2</sub> O) <sub>0.42</sub> , C <sub>4</sub> H <sub>10</sub> O, (C <sub>5</sub> H <sub>5</sub> N) <sub>0.95</sub> + solvent | C <sub>131</sub> H <sub>98</sub> Ag <sub>29</sub> N <sub>1</sub> P <sub>3</sub> S <sub>24</sub> , K(C <sub>5</sub> H <sub>5</sub> N) <sub>2.55</sub> (H <sub>2</sub> O) <sub>0.45</sub> , K(C <sub>5</sub> H <sub>5</sub> N) <sub>2</sub> (H <sub>2</sub> O) <sub>0.5</sub> , K(C <sub>5</sub> H <sub>5</sub> N) <sub>3</sub> (H <sub>2</sub> O), (C <sub>5</sub> H <sub>5</sub> N) <sub>1.5</sub> , (C <sub>4</sub> H <sub>10</sub> O) <sub>0.5</sub> + solvent | C <sub>131</sub> H <sub>98</sub> Ag <sub>29</sub> NP <sub>3</sub> S <sub>24</sub> , K(C <sub>5</sub> H <sub>5</sub> N) <sub>2</sub> (H <sub>2</sub> O) <sub>0.5</sub> , K(C <sub>5</sub> H <sub>5</sub> N) <sub>3</sub> , C <sub>5</sub> H <sub>5</sub> N + solvent | C <sub>131</sub> H <sub>98</sub> Ag <sub>29</sub> N <sub>1</sub> P <sub>3</sub> S <sub>24</sub> , K(C <sub>5</sub> H <sub>5</sub> N) <sub>2</sub> , K(C <sub>5</sub> H <sub>5</sub> N) <sub>3</sub> , K(C <sub>5</sub> H <sub>5</sub> N)(H <sub>2</sub> O), C <sub>5</sub> H <sub>5</sub> N + solvent |
| Crystal system                                      | Trigonal                                                                                                                                                              | Triclinic                                                                                                                                                                                                                                                                                                                                                                                                                                                                                                      | Triclinic                                                                                                                                                                                                                                                                                                                                                                                                                                                        | Triclinic                                                                                                                                                                                                                                                           | Triclinic                                                                                                                                                                                                                                                                                             |
| Space group                                         | <i>P</i> -3c1                                                                                                                                                         | <i>P</i> -1                                                                                                                                                                                                                                                                                                                                                                                                                                                                                                    | <i>P</i> -1                                                                                                                                                                                                                                                                                                                                                                                                                                                      | <i>P</i> -1                                                                                                                                                                                                                                                         | <i>P</i> -1                                                                                                                                                                                                                                                                                           |
| <i>a</i> (Å)                                        | 24.9668 (12)                                                                                                                                                          | 18.8237 (2)                                                                                                                                                                                                                                                                                                                                                                                                                                                                                                    | 18.7241 (2)                                                                                                                                                                                                                                                                                                                                                                                                                                                      | 18.6217 (3)                                                                                                                                                                                                                                                         | 18.5877 (3)                                                                                                                                                                                                                                                                                           |
| <i>b</i> (Å)                                        | 24.9668 (12)                                                                                                                                                          | 25.9820 (5)                                                                                                                                                                                                                                                                                                                                                                                                                                                                                                    | 25.7569 (2)                                                                                                                                                                                                                                                                                                                                                                                                                                                      | 24.4444 (3)                                                                                                                                                                                                                                                         | 26.3303 (4)                                                                                                                                                                                                                                                                                           |
| <i>c</i> (Å)                                        | 44.2740 (11)                                                                                                                                                          | 27.2295 (5)                                                                                                                                                                                                                                                                                                                                                                                                                                                                                                    | 26.7364 (3)                                                                                                                                                                                                                                                                                                                                                                                                                                                      | 27.0076 (4)                                                                                                                                                                                                                                                         | 27.0946 (5)                                                                                                                                                                                                                                                                                           |
| $\alpha$ (deg)                                      | 90                                                                                                                                                                    | 117.517 (2)                                                                                                                                                                                                                                                                                                                                                                                                                                                                                                    | 75.7260 (10)                                                                                                                                                                                                                                                                                                                                                                                                                                                     | 84.7969 (11)                                                                                                                                                                                                                                                        | 117.9701 (17)                                                                                                                                                                                                                                                                                         |
| $\beta$ (deg)                                       | 90                                                                                                                                                                    | 90.4220 (10)                                                                                                                                                                                                                                                                                                                                                                                                                                                                                                   | 89.4250 (10)                                                                                                                                                                                                                                                                                                                                                                                                                                                     | 89.5296 (11)                                                                                                                                                                                                                                                        | 90.7695 (13)                                                                                                                                                                                                                                                                                          |
| $\gamma$ (deg)                                      | 120                                                                                                                                                                   | 90.8230 (10)                                                                                                                                                                                                                                                                                                                                                                                                                                                                                                   | 80.7010 (10)                                                                                                                                                                                                                                                                                                                                                                                                                                                     | 82.4959 (11)                                                                                                                                                                                                                                                        | 90.4463 (13)                                                                                                                                                                                                                                                                                          |
| <i>V</i> (Å <sup>3</sup> )                          | 23900 (2)                                                                                                                                                             | 11808.1 (4)                                                                                                                                                                                                                                                                                                                                                                                                                                                                                                    | 12326.0 (2)                                                                                                                                                                                                                                                                                                                                                                                                                                                      | 12138.2 (3)                                                                                                                                                                                                                                                         | 11709.1 (4)                                                                                                                                                                                                                                                                                           |
| <i>Z</i>                                            | 4                                                                                                                                                                     | 2                                                                                                                                                                                                                                                                                                                                                                                                                                                                                                              | 2                                                                                                                                                                                                                                                                                                                                                                                                                                                                | 2                                                                                                                                                                                                                                                                   | 2                                                                                                                                                                                                                                                                                                     |
| $\rho$ (g cm <sup>-3</sup> )                        | 1.639                                                                                                                                                                 | 1.895                                                                                                                                                                                                                                                                                                                                                                                                                                                                                                          | 1.773                                                                                                                                                                                                                                                                                                                                                                                                                                                            | 1.707                                                                                                                                                                                                                                                               | 1.806                                                                                                                                                                                                                                                                                                 |
| $\mu$ (mm <sup>-1</sup> )                           | 2.564                                                                                                                                                                 | 3.070                                                                                                                                                                                                                                                                                                                                                                                                                                                                                                          | 2.557                                                                                                                                                                                                                                                                                                                                                                                                                                                            | 2.574                                                                                                                                                                                                                                                               | 2.688                                                                                                                                                                                                                                                                                                 |
| <i>F</i> (000)                                      | 11164                                                                                                                                                                 | 6405                                                                                                                                                                                                                                                                                                                                                                                                                                                                                                           | 6321                                                                                                                                                                                                                                                                                                                                                                                                                                                             | 5956                                                                                                                                                                                                                                                                | 6088                                                                                                                                                                                                                                                                                                  |
| Crystal size (mm)                                   | 0.3 × 0.3 × 0.03                                                                                                                                                      | 0.35 × 0.03 × 0.03                                                                                                                                                                                                                                                                                                                                                                                                                                                                                             | 0.63 × 0.18 × 0.03                                                                                                                                                                                                                                                                                                                                                                                                                                               | 0.48 × 0.10 × 0.03                                                                                                                                                                                                                                                  | 0.48 × 0.11 × 0.03                                                                                                                                                                                                                                                                                    |
| Final <i>R</i> indices ( <i>I</i> ≥ 2σ( <i>I</i> )) | <i>R</i> <sub>1</sub> = 0.0867, <i>wR</i> <sub>2</sub> = 0.2944                                                                                                       | <i>R</i> <sub>1</sub> = 0.0703, <i>wR</i> <sub>2</sub> = 0.1889                                                                                                                                                                                                                                                                                                                                                                                                                                                | <i>R</i> <sub>1</sub> = 0.0384, <i>wR</i> <sub>2</sub> = 0.1097                                                                                                                                                                                                                                                                                                                                                                                                  | <i>R</i> <sub>1</sub> = 0.0750, <i>wR</i> <sub>2</sub> = 0.1935                                                                                                                                                                                                     | <i>R</i> <sub>1</sub> = 0.1502, <i>wR</i> <sub>2</sub> = 0.3696                                                                                                                                                                                                                                       |
| Final <i>R</i> indices (all)                        | <i>R</i> <sub>1</sub> = 0.1174, <i>wR</i> <sub>2</sub> = 0.3369                                                                                                       | <i>R</i> <sub>1</sub> = 0.0918, <i>wR</i> <sub>2</sub> = 0.1982                                                                                                                                                                                                                                                                                                                                                                                                                                                | <i>R</i> <sub>1</sub> = 0.0421, <i>wR</i> <sub>2</sub> = 0.1115                                                                                                                                                                                                                                                                                                                                                                                                  | <i>R</i> <sub>1</sub> = 0.0937, <i>wR</i> <sub>2</sub> = 0.2137                                                                                                                                                                                                     | <i>R</i> <sub>1</sub> = 0.1819, <i>wR</i> <sub>2</sub> = 0.3902*                                                                                                                                                                                                                                      |
| CCDC number                                         | 2076349                                                                                                                                                               | 2298858                                                                                                                                                                                                                                                                                                                                                                                                                                                                                                        | 2298942                                                                                                                                                                                                                                                                                                                                                                                                                                                          | 2298943                                                                                                                                                                                                                                                             | 2298944                                                                                                                                                                                                                                                                                               |

**Table S2.** Comparison of bond lengths (average).

|                                                                                                   | Ag <sub>29</sub> -Na | Ag <sub>29</sub> -Cs | Ag <sub>29</sub> -K | Ag <sub>29</sub> -K' | Ag <sub>29</sub> -K'' |
|---------------------------------------------------------------------------------------------------|----------------------|----------------------|---------------------|----------------------|-----------------------|
| kernel Ag–<br>icosahedral Ag                                                                      | 2.772 Å              | 2.771 Å              | 2.771 Å             | 2.771 Å              | 2.770 Å               |
| icosahedral Ag–<br>icosahedral Ag                                                                 | 2.914 Å              | 2.914 Å              | 2.913 Å             | 2.913 Å              | 2.913 Å               |
| icosahedral Ag–<br>crown Ag (Ag <sub>3</sub> S <sub>3</sub> )                                     | 3.159 Å              | 3.142 Å              | 3.151 Å             | 3.152 Å              | 3.139 Å               |
| icosahedral Ag–<br>motif Ag (Ag <sub>1</sub> S <sub>3</sub> )                                     | 3.065 Å              | 3.375 Å              | 3.367 Å             | 3.320 Å              | 3.383 Å               |
| icosahedral Ag–<br>motif Ag bound to pyridine (Ag <sub>1</sub> S <sub>3</sub> )                   | 3.091 Å              | 3.069 Å              | 3.051 Å             | 3.039 Å              | 3.039 Å               |
| icosahedral Ag–<br>motif Ag bound to TPP (Ag <sub>1</sub> S <sub>3</sub> )                        | —                    | 3.477 Å              | 3.472 Å             | 3.413 Å              | 3.498 Å               |
| crown Ag (Ag <sub>3</sub> S <sub>3</sub> )–<br>crown Ag (Ag <sub>3</sub> S <sub>3</sub> )         | 3.113 Å              | 3.163 Å              | 3.125 Å             | 3.112 Å              | 3.119 Å               |
| crown Ag (Ag <sub>3</sub> S <sub>3</sub> )–<br>crown $\mu_2$ -S (Ag <sub>3</sub> S <sub>3</sub> ) | 2.463 Å              | 2.460 Å              | 2.468 Å             | 2.469 Å              | 2.460 Å               |
| crown Ag (Ag <sub>3</sub> S <sub>3</sub> )–<br>crown $\mu_3$ -S (Ag <sub>3</sub> S <sub>3</sub> ) | 2.465 Å              | 2.479 Å              | 2.486 Å             | 2.484 Å              | 2.487 Å               |
| crown S (Ag <sub>3</sub> S <sub>3</sub> )–<br>alkali metal                                        | 2.928 Å              | 3.492 Å              | 3.296 Å             | 3.282 Å              | 3.263 Å               |

**Table S3.** Absolute PLQY and PL lifetime of Ag<sub>29</sub>-Na, K, Cs and Ag NCs in pyridine solutions.

| Sample                             | $\lambda_{PL}$ | PLQY | Lifetime     |
|------------------------------------|----------------|------|--------------|
| Ag <sub>29</sub> -Na <sup>S2</sup> | 770 nm         | 33%  | 9.16 $\mu$ s |
| Ag <sub>29</sub> -K                | 770 nm         | 28%  | 11.2 $\mu$ s |
| Ag <sub>29</sub> -Cs               | 770 nm         | 39%  | 9.88 $\mu$ s |
| Ag <sub>29</sub> +Ag <sup>S3</sup> | 770 nm         | 39%  | 9.77 $\mu$ s |

**Table S4.** Fitting results of PL lifetime data of Ag<sub>29</sub>-K, Ag<sub>29</sub>-K' and Ag<sub>29</sub>-K''.

| Sample                | $\tau_1$ ( $\mu$ s) | $A_1$ <sup>1</sup> | $\tau_2$ ( $\mu$ s) | $A_2$ <sup>1</sup> | $\tau_3$ ( $\mu$ s) | $A_3$ <sup>1</sup> | $\tau_{ave}$ ( $\mu$ s) <sup>2</sup> |
|-----------------------|---------------------|--------------------|---------------------|--------------------|---------------------|--------------------|--------------------------------------|
| Ag <sub>29</sub> -K   | 1.41                | 0.92               | 18.4                | 0.06               | 277                 | 0.03               | 9.37                                 |
| Ag <sub>29</sub> -K'  | 2.19                | 0.37               | 4.60                | 0.63               | -                   | -                  | 3.70                                 |
| Ag <sub>29</sub> -K'' | 2.05                | 0.49               | 6.54                | 0.51               | -                   | -                  | 4.33                                 |

<sup>1</sup> A<sub>1</sub>, A<sub>2</sub>: Normalized pre-exponential factor<sup>2</sup> The averaged decay time is defined by:  $\tau_{ave} = \frac{\sum_j A_j t_j}{\sum_j A_j}$ 

## Reference

- S1. L. G. AbdulHalim, M. S. Bootharaju, Q. Tang, S. Del Gobbo, R. G. AbdulHalim, M. Eddaoudi, D. E. Jiang and O. M. Bakr, *J. Am. Chem. Soc.*, 2015, **137**, 11970–11975
- S2. W. Ishii, S. Katao, Y. Nishikawa, Y. Okajima, A. Hatori, M. Ehara, T. Kawai and T. Nakashima, *Chem. Commun.*, 2021, **57**, 6483–6486.
- S3. W. Ishii, Y. Okayasu, Y. Kobayashi, R. Tanaka, S. Katao, Y. Nishikawa, T. Kawai and T. Nakashima, *J. Am. Chem. Soc.*, 2023, **145**, 11236–11244.
